# Supplementary material for: A brain cyst load-associated antigen is a Toxoplasma gondii biomarker for serodetection of persistent parasites and chronic infection
Source: PubMed Central journal article supplement (PMC7871634; doi:10.1186/s12915-021-00959-9), 2021-02-09
Supplement: 12915_2021_959_MOESM4_ESM.pdf [file 12915_2021_959_MOESM4_ESM.pdf]

**A**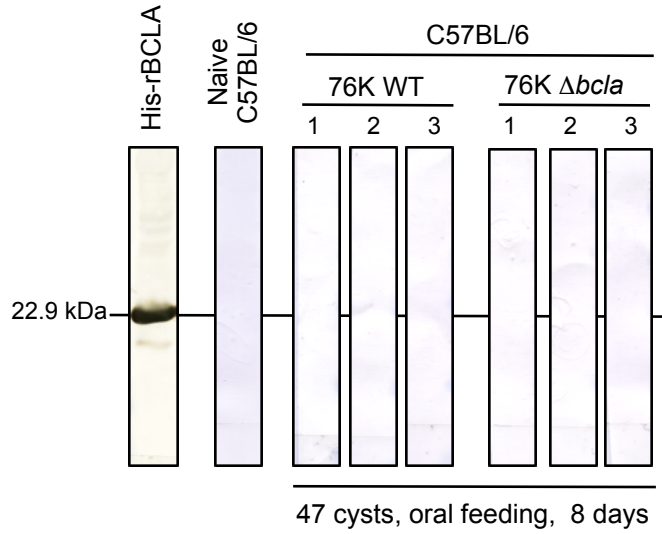**B**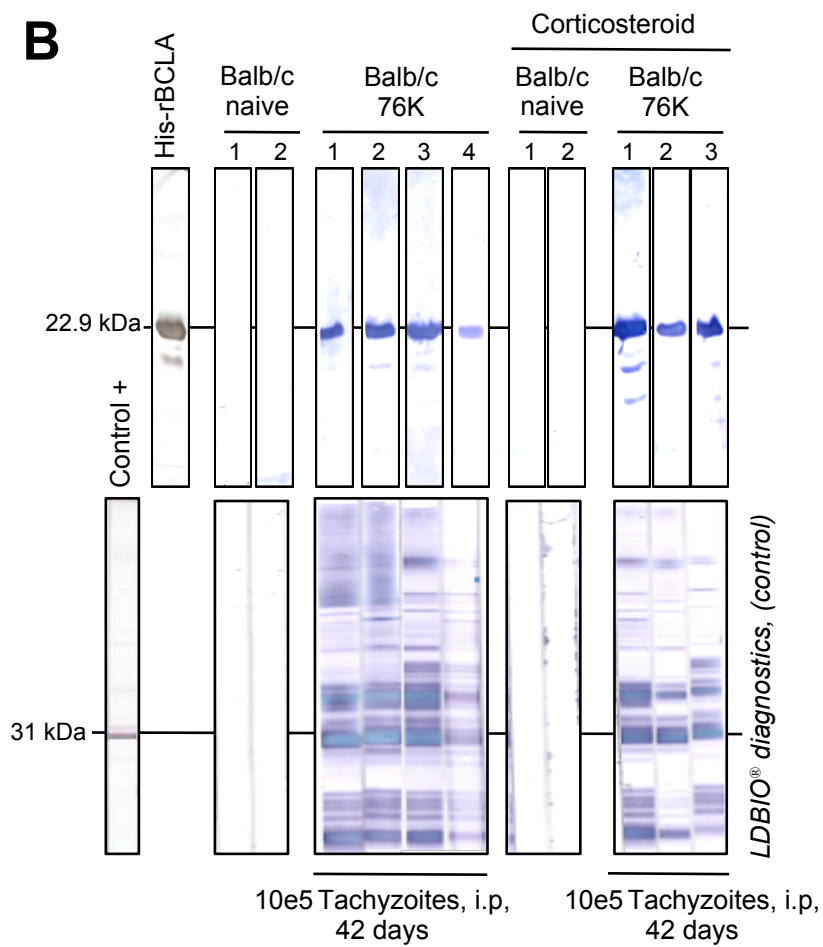**Additional file 4: Figure S3**
